# Supplementary material for: Plant Tolerance to Drought Stress with Emphasis on Wheat
Source: MDPI journal article supplement (doi:10.3390/plants12112170), 2023-05-30
Supplement: s1 [file s1]

**Table S2.** Drought stress and their related candidate genes in model plant. A complement of this table is available from [29].

| Gene           | Acession number | Plant species      | Function                                                                                                                                                                                            | References |
|----------------|-----------------|--------------------|-----------------------------------------------------------------------------------------------------------------------------------------------------------------------------------------------------|------------|
| <i>IDM1</i>    | AT3G14980.1     | <i>T. aestivum</i> | Preventing DNA hypermethylation of highly homologous multicopy genes and other repetitive sequences.                                                                                                | [52]       |
| <i>CIPK3</i>   | AT2G26980       | <i>T. aestivum</i> | Encodes a serine-threonine protein kinase whose expression increases in response to ABA, cold, drought, high salt, and wounding conditions. The gene is expressed in developing seeds and seedlings | [52]       |
| <i>PAL4</i>    | AT3G10340       | <i>T. aestivum</i> | Controls carbon flux to a variety of bioactive small-molecule aromatic compounds, and lignin                                                                                                        | [52]       |
| <i>CYP73A5</i> | AT2G30490       | <i>T. aestivum</i> | Catalyzes the first oxidative step of the phenylpropanoid pathway in higher plants by transforming trans-cinnamate into p-coumarate                                                                 | [52]       |
| <i>ABCG11</i>  | AT1G17840       | <i>T. aestivum</i> | Essential for synthesis of plant organs like root development                                                                                                                                       | [52]       |
| <i>WAKL21</i>  | A4A49_34180     | <i>T. aestivum</i> | Signaling receptor of extracellular matrix component                                                                                                                                                | [52]       |
| <i>AMY1</i>    | AT4G25000       | <i>T. aestivum</i> | Expressed 7 to 9 days after from pollination and during the seed development                                                                                                                        | [52]       |
| <i>RPS15AE</i> | AT4G29430       | <i>T. aestivum</i> | Enables structural constituent of ribosome                                                                                                                                                          | [52]       |
| <i>CYP94C1</i> | AT2G27690       | <i>T. aestivum</i> | Bioactive phytohormone of the jasmonate hormonal pathway regulating important defensive and developmental processes in plants                                                                       | [52]       |
| <i>NPY1</i>    | YGL067W         | <i>T. aestivum</i> | Regulates phototropic responses along with protein kinases                                                                                                                                          | [52]       |
| <i>PSAT2</i>   | AT2G17630       | <i>T. aestivum</i> | Enables O-phospho-L-serine:2-oxoglutarate aminotransferase activity, pyridoxal phosphate binding                                                                                                    | [52]       |
| <i>FH6</i>     | AT5G67470       | <i>T. aestivum</i> | Enables actin binding                                                                                                                                                                               | [52]       |
| <i>RXF12</i>   | AT1G58370       | <i>T. aestivum</i> | Improves the dough's rheological properties, such as softness, ductility, and elasticity, and the bread's specific volume and crumb hardness                                                        | [52]       |
| <i>TIN1</i>    | AT5G64510       | <i>T. aestivum</i> | Acts as transcriptional factor which controls buds outgrowth                                                                                                                                        | [52]       |
| <i>FY</i>      | AT5G13480       | <i>T. aestivum</i> | Regulation of flowering time                                                                                                                                                                        | [51]       |
| <i>MAP1A</i>   | AT2G45240       | <i>T. aestivum</i> | Removes the N-terminal methionine from proteins leading to abnormal development                                                                                                                     | [51]       |
| <i>LRL2</i>    | AT4G30980       | <i>T. aestivum</i> | Regulates root hair and sperm cell                                                                                                                                                                  | [51]       |

|                        |                 |                    |                                                                                                                   |       |
|------------------------|-----------------|--------------------|-------------------------------------------------------------------------------------------------------------------|-------|
|                        |                 |                    | development                                                                                                       |       |
| <i>ERMO2</i>           | AT3G07100       | <i>T. aestivum</i> | Required for endoplasmic reticulum (ER) morphology                                                                | [51]  |
| <i>RGLG2</i>           | AT5G14420       | <i>T. aestivum</i> | Negatively regulates the drought stress response by mediating the ERF53 transcriptional activity                  | [51]  |
| <i>RBOHB</i>           | AT1G09090       | <i>T. aestivum</i> | Plays a role in seed after-ripening                                                                               | [51]  |
| <i>GNL1</i>            | AT5G39500       | <i>T. aestivum</i> | Required for endoplasmic reticulum (ER) morphology                                                                | [51]  |
| <i>CYP70982</i>        | NA              | <i>T. aestivum</i> | Not found                                                                                                         | [51]  |
| <i>AGO1</i>            | AT1G48410       | <i>T. aestivum</i> | Regulates genes involved in the cross talk between auxin and light signaling during adventitious root development | [51]  |
| <i>DMP10</i>           | OSNPB_010389700 | <i>T. aestivum</i> | DOMAIN MEMBRANE PROTEIN 10                                                                                        | [51]  |
| <i>PSKR1</i>           | AT2G02220       | <i>T. aestivum</i> | Contains dual guanylate cyclase and kinase catalytic activities that operate in vivo                              | [51]  |
| <i>CSC1</i>            | AT4G22120       | <i>T. aestivum</i> | Calcium-permeable stretch activated cation channel.                                                               | [51]  |
| <i>GME</i>             | AT5G28840       | <i>T. aestivum</i> | Catalyzes the conversion of GDP-D-mannose to GDP-L-galactose.                                                     | [51]  |
| <i>ARR12</i>           | HvARR12         | <i>H. vulgare</i>  | two-component response regulator                                                                                  | [230] |
| <i>PIP</i>             | HvPip           | <i>H. vulgare</i>  | Proline iminopeptidase                                                                                            | [230] |
| <i>DI19-2</i>          | HvDI19-2        | <i>H. vulgare</i>  | Dehydration stress-inducible gene                                                                                 | [230] |
| <i>ADC</i>             | HvADC           | <i>H. vulgare</i>  | Arginine decarboxylase                                                                                            | [230] |
| <i>HRGP</i>            | HvHRGP          | <i>H. vulgare</i>  | Hydroxyproline-rich glycoprotein                                                                                  | [230] |
| <i>PRP</i>             | HvPRP           | <i>H. vulgare</i>  | Proline-rich family protein                                                                                       | [230] |
| <i>C4H</i>             | HvC4H           | <i>H. vulgare</i>  | Cinnamate-4-hydroxylase                                                                                           | [230] |
| <i>OsALDH2-1</i>       | Os01g40860      | <i>O. sativa</i>   | Expressed in seeds and no essential for seed vigor                                                                | [231] |
| <i>OsALDH2-2</i>       | Os01g40870      | <i>O. sativa</i>   | Expressed in seeds and essential for seed vigor                                                                   | [231] |
| <i>OsWRKY45</i>        | Os05g25770      | <i>O. sativa</i>   | Defense ABA signaling pathway                                                                                     | [231] |
| <i>OsMSOD1</i>         | Os05g25850      | <i>O. sativa</i>   | Limits reactive oxygen species damage during drought stress                                                       | [231] |
| <i>OsRCN1</i>          | Os11g05470      | <i>O. sativa</i>   | Expressed in vein leaf and important for floral transition                                                        | [231] |
| <i>OsZIP79</i>         | Os11g05480      | <i>O. sativa</i>   | Regulation of phytoalexin production                                                                              | [231] |
| <i>OsZIP80</i>         | Os11g05640      | <i>O. sativa</i>   | Dehydration stress-inducible gene                                                                                 | [231] |
| <i>LOC103637669</i>    | Zm00001d029938  | <i>Z. mays</i>     | Protein ARABIDILLO 1                                                                                              | [232] |
| <i>S1_93277641</i>     | Zm00001d029937  | <i>Z. mays</i>     | Glycoprotein                                                                                                      | [232] |
| <i>PZE-103003226</i>   | Zm00001d039319  | <i>Z. mays</i>     | Tic22-like family protein                                                                                         | [232] |
| <i>LOC100500952</i>    | Zm00001d042997  | <i>Z. mays</i>     | HIT-type zinc-finger family protein                                                                               | [232] |
| <i>LOC100284853</i>    | Zm00001d029937  | <i>Z. mays</i>     | Glycoprotein                                                                                                      | [232] |
| <i>LOC103637669</i>    | Zm00001d029938  | <i>Z. mays</i>     | Protein ARABIDILLO 1                                                                                              | [232] |
| <i>LOC100272678</i>    | Zm00001d020506  | <i>Z. mays</i>     | 26S proteasome non-ATPase regulatory subunit 9                                                                    | [232] |
| <i>LOC100283961</i>    | Zm00001d013992  | <i>Z. mays</i>     | Pyridoxal phosphate-dependent transferase family protein                                                          | [232] |
| <i>chr2.S_68691618</i> | Zm00001d003939  | <i>Z. mays</i>     | 11- $\beta$ -hydroxysteroid dehydrogenase                                                                         | [232] |

|                       |                                                           |                       |                                                                       |       |
|-----------------------|-----------------------------------------------------------|-----------------------|-----------------------------------------------------------------------|-------|
| <i>S2_226449870</i>   | GRMZM2G070937                                             | <i>Z. mays</i>        | Leu-rich repeat protein kinase family                                 | [232] |
| <i>LOC100286093</i>   | Zm00001d012167                                            | <i>Z. mays</i>        | Silk fibroin (SF16) protein                                           | [232] |
| <i>SbZfl1</i>         | NA                                                        | <i>S. bicolor</i>     | SET binding factor 1                                                  | [67]  |
| <i>SbCN12</i>         | NA                                                        | <i>S. bicolor</i>     | Ortholog of ZCN12 that have been proposed to encode florigens         | [67]  |
| <i>BADH</i>           | I8G32_RS03395                                             | <i>S. bicolor</i>     | 2-hydroxycyclohexanecarboxyl-CoA dehydrogenase                        | [77]  |
| <i>RuBisCO</i>        | Csa_5G609710                                              | <i>S. bicolor</i>     | Ribulose biphosphate carboxylase small chain, chloroplastic-like      | [77]  |
| <i>PEPC</i>           | AT3G14940                                                 | <i>S. bicolor</i>     | Phosphoenolpyruvate carboxylase                                       | [77]  |
| <i>DHN</i>            | SORBI_3009G11670<br>0                                     | <i>S. bicolor</i>     | Dehydrin DHN1                                                         | [77]  |
| <i>PTKs</i>           | NA                                                        | <i>S. bicolor</i>     |                                                                       | [77]  |
| <i>BADH</i>           | NA                                                        | <i>Brassica napus</i> | Betaine aldehyde dehydrogenase                                        | [233] |
| <i>P5CS2</i>          | AT3G55610                                                 | <i>B. napus</i>       | Delta 1-pyrroline-5-carboxylate synthetase                            | [233] |
| <i>ADC2</i>           | AT4G34710                                                 | <i>B. napus</i>       | Arginine decarboxylase                                                | [233] |
| <i>btg-26</i>         | HID58_028326                                              | <i>B. napus</i>       | Aldehyde dehydrogenase family 7 member A1-<br>Brassica turgor gene 26 | [233] |
| <i>MDA</i>            | GRMZM2G081380                                             | <i>Maize</i>          | Ca <sup>2+</sup> binding actin bunding protein                        | [234] |
| <i>REC</i>            | GRMZM2G171179                                             | <i>Maize</i>          | AP2/EREB160 transcription factor                                      | [234] |
| <i>SOD</i>            | GRMZM2G152278                                             | <i>Maize</i>          | Calcium-dependent lipid binding protein                               | [234] |
| <i>BART1_0-P29927</i> | HORVU4Hr1G0603<br>70                                      | <i>Barley</i>         | Protein phosphatase 2C family protein                                 | [235] |
| <i>BART1_0-P34164</i> | HORVU5Hr1G0279<br>10                                      | <i>Barley</i>         | Chaperone protein htpG family protein                                 | [235] |
| <i>BART1_0-p07678</i> | HORVU2Hr1G0109<br>90                                      | <i>Barley</i>         | Aquaporin-like superfamily protein                                    | [235] |
| <i>BART1_0-P51213</i> | HORVU7Hr1G0370<br>80                                      | <i>Barley</i>         | Low quality protein: annexin D2                                       | [235] |
| <i>BART1_0-P29181</i> | HORVU4Hr1G0495<br>00                                      | <i>Barley</i>         | Sucrose synthase 3                                                    | [235] |
| <i>BART1_0-P15058</i> | HORVU2Hr1G1068<br>80                                      | <i>Barley</i>         | Putative zeaxanthin epoxidase                                         | [235] |
| <i>BART1_0-P37103</i> | HORVU5Hr1G0707<br>20                                      | <i>Barley</i>         | Molecular chaperone HtpG                                              | [235] |
| <i>GhHUB2</i>         | GhHUB2-A<br>(XM_016856414),<br>GhHUB2-D<br>(XM_016843047) | <i>Cotton</i>         | Histone H2B monoubiquitinatin E3 ligase encoding gene                 | [236] |
| <i>GhMKK3</i>         | HQ828070                                                  | <i>Cotton</i>         | Enhanced drought tolerance                                            | [237] |
| <i>GhMAP3K40</i>      | LOC107939304                                              | <i>Cotton</i>         | Salt and drought stress tolerance at the germination stage            | [238] |
| <i>GhMPK4</i>         | CotAD_19088                                               | <i>Cotton</i>         | Increased sensitivity to ABA, salt, and drought                       | [239] |
| <i>GhMPK17</i>        | NM001035863                                               | <i>Cotton</i>         | Osmotic and salt stress tolerance                                     | [240] |
| <i>GbMPK3</i>         | NP_190150                                                 | <i>Cotton</i>         | Enhanced oxidative and drought stress tolerance                       | [241] |
