# Supplementary material for: Plant Tolerance to Drought Stress with Emphasis on Wheat
Source: MDPI journal article supplement (doi:10.3390/plants12112170), 2023-05-30
Supplement: s1 [file s1]

**Table S3.** Improving drought tolerance of wheat through engineering gene. A complement of this table is available from [201].

| Gene            | Source                       | Improved traits                                                                                                                | References |
|-----------------|------------------------------|--------------------------------------------------------------------------------------------------------------------------------|------------|
| <i>P5CS</i>     | <i>T. aestivum</i>           | Promotes proline accumulation                                                                                                  | [242]      |
| <i>TaFER-5B</i> | <i>T. aestivum</i> cv TAM107 | Promotes higher leaf's iron and ROS content, drought and temperature tolerance                                                 | [201]      |
| <i>TaPEPKR2</i> | <i>T. aestivum</i> cv TAM107 | Promotes higher drought tolerance and root length                                                                              | [201]      |
| <i>TaSHN1</i>   | <i>T. aestivum</i> cv RAC875 | Promotes lower stomatal density and leaf water loss, beter recovery after severe drought                                       | [243]      |
| <i>TaNf-YB4</i> | <i>T. aestivum</i> cv RAC875 | Promotes more spikes                                                                                                           | [243]      |
| <i>DREB/CBF</i> | <i>T. aestivum</i> cv RAC875 | Enhanced ability to survive to frost and drought                                                                               | [243]      |
| <i>TuNAC69</i>  | <i>T. aestivum</i>           | Larger root biomass and root length                                                                                            | [244]      |
| <i>TabZIP2</i>  | <i>T. aestivum</i> cv RAC875 | Fewer spikes and seeds, higher seed weight                                                                                     | [243]      |
| <i>DREB</i>     | <i>T. durum</i> cv Langdon   | Higher survival rate, slower growth, delayed flowering, lower grain yield                                                      | [245]      |
| <i>RRF</i>      | Rice                         | Promotes chloroplast development and early stages of embryo development.                                                       | [246]      |
| Rhodanese       | Rice                         | Promotes cell cycle control by phosphatase superfamily protein                                                                 | [246]      |
| <i>MRL1</i>     | Rice                         | A conserved pentatricopeptide repeat protein required for stabilization of rbcL mRNA                                           | [246]      |
| <i>PGRL1B</i>   | Rice                         | A transmembrane protein present in thylakoids. Plants lacking PGRL1 show perturbation of cyclic electron flow                  | [246]      |
| <i>LHCB3</i>    | Rice                         | A component of the main light-harvesting chlorophyll a/b-protein complex of Photosystem II (LHC II)                            | [246]      |
| <i>RPH1</i>     | Rice                         | A chloroplast protein RPH1 (resistance to <i>Phytophthora 1</i> ) involved in immune response to <i>Phytophthora brassicae</i> | [246]      |
| <i>APL1</i>     | Rice                         | Large subunit of ADP-glucose pyrophosphorylase, which catalyzes the first and rate-limiting step in starch biosynthesis.       | [246]      |
| <i>HAD</i>      | Rice                         | Haloacid dehalogenase-like hydrolase (HAD) superfamily protein                                                                 | [246]      |
| <i>SOQ1</i>     | Rice                         | Suppressor of quenching 1 that prevents the formation                                                                          | [246]      |

|                       |                         |                                                                                                                                                                                                                          |       |
|-----------------------|-------------------------|--------------------------------------------------------------------------------------------------------------------------------------------------------------------------------------------------------------------------|-------|
|                       |                         | of a slowly reversible form of antenna quenching, thereby maintaining the efficiency of light harvesting.                                                                                                                |       |
| <i>PEROXIN11C</i>     | Rice                    | Member of the <i>peroxin11</i> ( <i>PEX11</i> ) gene family, integral to peroxisome membrane, controls peroxisome proliferation                                                                                          | [246] |
| <i>HvAKT2</i>         | Barley                  | Found in plasma membrane, H <sup>+</sup> homeostasis, K <sup>+</sup> uptake                                                                                                                                              | [247] |
| <i>HvHAK1</i>         | Barley                  | Found in plasma membrane, H <sup>+</sup> homeostasis, K <sup>+</sup> uptake                                                                                                                                              | [247] |
| <i>BART1_0-P34164</i> | Barley                  | Molecular chaperone HtpG, stabilize the folding, association and translocation                                                                                                                                           | [235] |
| <i>BART1_0-p07678</i> | Barley                  | Aquaporin protein that transport water                                                                                                                                                                                   | [235] |
| <i>BART1_0-P47576</i> | Barley                  | Betaine aldehyde dehydrogenase; it produces glycine betain and acts as osmoprotectant                                                                                                                                    | [235] |
| <i>BART1_0-P13794</i> | Barley                  | Absciscic stress-ripening protein 2, involved in plant growth and development                                                                                                                                            | [235] |
| <i>BART1_0-P29183</i> | Barley                  | Sucrose synthase                                                                                                                                                                                                         | [235] |
| <i>BART1_0-P29382</i> | Barley                  | Hexosyltransferase                                                                                                                                                                                                       | [235] |
| <i>BART1_0-P21831</i> | Barley                  | 2C-type protein phosphatase protein                                                                                                                                                                                      | [235] |
| <i>BART1_0-P15058</i> | Barley                  | Putative zeaxanthin epoxidase                                                                                                                                                                                            | [235] |
| <i>mtlD</i>           | <i>Escherichia coli</i> | Improved biomass and mannitol accumulation                                                                                                                                                                               | [248] |
| <i>DHN1</i>           | Maize                   | Dehydrins, help keeping cellular stability                                                                                                                                                                               | [249] |
| <i>KNR6</i>           | Maize                   | KERNEL NUMBER PER ROW6, which interacts with GTPase leading to increase the kernel number and to enhance the maize grain yield                                                                                           | [250] |
| <i>YIGE1</i>          | Maize                   | Encodes an unidentified protein that may have a role in sucrose and auxin signaling pathways, which could have an impact on the activity of the inflorescence meristem (IM) and on the maize inflorescence morphogenesis | [251] |
| <i>EAD1</i>           | Maize                   | Encodes a protein with cytoplasmic membrane localization that is selectively expressed in xylem conduit tissues of early maize ears and an aluminum-activated malate transporter.                                        | [252] |
| <i>AtGA2ox1</i>       | Maize                   | Preservation of cellular osmotic potential, regulating gibberellins content and enhancing transgenic maize's drought resistance.                                                                                         | [253] |
| <i>LEA5-D-like</i>    | Maize                   |                                                                                                                                                                                                                          | [254] |
| <i>SbER2-1</i>        | Maize                   | Present in plasma membrane and chloroplast. The transgenic maize have enhanced photosynthesis rate                                                                                                                       | [255] |

|                  |                           |                                                                                                                                     |       |
|------------------|---------------------------|-------------------------------------------------------------------------------------------------------------------------------------|-------|
|                  |                           | and phenylpropanoid metabolism that promotes drought tolerance.                                                                     |       |
| <i>qEL7</i>      | Maize                     | KERNEL EAR LENGTH7 increases the ethylene level, which play a role in auxin biosynthesis and boost grain yield                      | [256] |
| <i>ZmNF-YB16</i> | Maize                     | Transgenic maize showed high rate of photosynthesis and cellular antioxidant capacity during the vegetative and reproductive stage. | [257] |
| <i>ZmPYL7</i>    | Maize                     | The expression of this gene in shoots and roots regulates the ABA level and enhances drought tolerance                              | [258] |
| <i>ahb2</i>      | Maize                     | Induce fast stomata closure to reduce water lost during dehydration stress.                                                         | [259] |
| <i>BADH</i>      | <i>Atriplex hortensis</i> | Higher BADH activity under normal growth                                                                                            | [260] |
