# Supplementary material for: Plant Tolerance to Drought Stress with Emphasis on Wheat
Source: MDPI journal article supplement (doi:10.3390/plants12112170), 2023-05-30
Supplement: s1 [file s1]

**Table S1a.** QTLs of agronomic traits identified for drought tolerance in cereals. A complement of this table is available from [29].

| Traits                           | QTL number | Linkage group      | Crop   | Phenotype variation,<br>% | References |
|----------------------------------|------------|--------------------|--------|---------------------------|------------|
| Grain volume weight              | 5          | 2A, 2B, 5A, 5D, 7B | Wheat  | 14.9-24.5                 | [218]      |
| Days to heading                  | 4          | 4A, 5A, 5D, 7B     | Wheat  | 13.4-38.4                 | [218]      |
| Days to flowering                | 5          | 1, 2, 3, 5, 11     | Rice   | 3.2-11.1                  | [219]      |
| Plant height                     | 2          | 2D, 6A             | Rice   | 11.4, 17.2                | [218]      |
|                                  | 2          | 1, 11              | Rice   | 6.0, 7.7                  | [219]      |
|                                  | 1          | 1                  | Rice   | 13.1                      | [220]      |
|                                  | 2          | 1, 6               | Rice   | 19.5, 25.0                | [221]      |
|                                  | 1          | 10                 | Maize  | 10.0                      | [222]      |
|                                  | 3          | 4H, 5H             | Barley | 5.1-7.7                   | [223]      |
| Leaf number                      | 2          | 3, 5               | Barley | 2.6, 3.3                  | [224]      |
| Leaf weight                      | 3          | 2, 4, 7            | Barley | 2.9-3.6                   | [224]      |
| Stomata number                   | 1          | 1                  | Barley | 16.5                      | [224]      |
| Leaf rolling index               | 7          | 1, 2, 3, 4, 7, 12  | Rice   | 4.0-13.8                  | [225]      |
| Leaf withering degree            | 6          | 1, 2, 3, 5, 6, 10  | Rice   | 4.2-11.1                  | [225]      |
| Chlorophyll content              | 4          | 1, 3, 5, 11        | Rice   | 3.6-6.7                   | [225]      |
| Days to 50% flowering            | 3          | 6                  | Rice   | 2.6-6.0                   | [220]      |
| Tillers per plant                | 1          | 11                 | Rice   | 19.5                      | [221]      |
| Culm length                      | 1          | 2                  | Rice   | 29.5                      | [221]      |
| Leaf dry weight                  | 1          | 3                  | Rice   | 34.0                      | [221]      |
| Stem dry weight                  | 1          | 3                  | Rice   | 7.5                       | [221]      |
| Total shoot dry weight           | 1          | 3                  | Rice   | 6.9                       | [221]      |
| Total water uptake               | 2          | 3, 4               | Rice   | 10.0, 17.1                | [221]      |
| Root weight                      | 2          | 1, 2               | Barley | 11.2, 14.5                | [224]      |
| Total root dry weight            | 1          | 3                  | Rice   | 20.9                      | [221]      |
| Deep root length                 | 3          | 3, 9, 11           | Rice   | 3.8-29.5                  | [221]      |
| Deep root volume                 | 1          | 3                  | Rice   | 25.8                      | [221]      |
| Deep root surface area           | 2          | 3                  | Rice   | 13.6, 32.1                | [221]      |
| Deep root diameter               | 2          | 3                  | Rice   | 18.3, 25.4                | [221]      |
| Ear height                       | 4          | 4, 6, 7            | Maize  | 6.0-13.0                  | [226]      |
| Ear weight                       | 5          | 1, 4, 5, 9         | Maize  | 4.8-15.6                  | [226]      |
| Ear length                       | 3          | 2, 4, 9            | Maize  | 6.4-14.5                  | [226]      |
|                                  | 5          | 2, 3, 8, 10        | Maize  | 3.5-8.8                   | [227]      |
| Ear diameter                     | 5          | 3, 4, 5, 7         | Maize  | 2.0-3.2                   | [227]      |
| Ear height-to-plant height ratio | 5          | 1, 3, 6, 8         | Maize  | 4.1-11.2                  | [222]      |
| Grain weight per ear             | 9          | 1, 2, 4, 6, 8, 9   | Maize  | 2.8-12.9                  | [222]      |
| Number of rows per ear           | 5          | 1, 5, 10           | Maize  | 9.0-12.7                  | [227]      |
| Number of kernels per row        | 6          | 3, 4, 5, 7         | Maize  | 1.6-13.2                  | [227]      |

|                           |   |                |        |           |       |
|---------------------------|---|----------------|--------|-----------|-------|
| Kernel ratio              | 6 | 1, 3, 6        | Maize  | 4.1-13.6  | [222] |
| Anthesis-silking interval | 2 | 4, 7           | Maize  | 6.4-8.5   | [226] |
| Cob weight                | 4 | 1, 4, 9        | Maize  | 4.0-12.4  | [226] |
| 100-kernel weight         | 2 | 1, 4           | Maize  | 5.1-13.1  | [226] |
| 1000-kernels weight       | 5 | 1, 2, 7, 10    | Maize  | 2.3-34.2  | [227] |
|                           | 3 | 2, 4           | Barley | 5.2-5.7   | [223] |
| Kernel length             | 2 | 5, 7           | Maize  | 10.2-32.1 | [227] |
| Kernel width              | 6 | 1, 2, 6, 7     | Maize  | 2.0-5.0   | [227] |
| Kernel thickness          | 5 | 2, 5, 7, 8, 10 | Maize  | 2.5-4.0   | [227] |
| Kernel per spike          | 8 | 2              | Barley | 5.1-5.7   | [223] |
| Dry weight in tillering   | 2 | 4              | Barley | 6.3-6.6   | [223] |
| Biomass                   | 4 | 2, 5           | Barley | 5.0-6.7   | [223] |
| Hectoliter weight         | 3 | 1, 5           | Barley | 7.2-11.0  | [223] |
| Harvest index             | 3 | 1, 5           | Barley | 5.8-11.0  | [223] |

**Table S1b.** QTLs of agronomic traits identified in soybean for drought tolerance. A complement of this table is available from [228].

| QTL Name      | Traits               | Chromosome and linkage group | Phenotypic variation, % | References |
|---------------|----------------------|------------------------------|-------------------------|------------|
| Gm05_2548644  | SW                   | 5                            | 10.4                    | [229]      |
| Gm06_43432590 | SW                   | 6                            | 29.6                    | [229]      |
| Gm09_36869408 | SW                   | 9                            | 8.0                     | [229]      |
| Gm10_44445941 | SW                   | 10                           | 20.0                    | [229]      |
| Gm12_37803362 | SW                   | 12                           | 7.8                     | [229]      |
| Gm19_45553057 | SW                   | 19                           | 9.3                     | [229]      |
| qMRL001       | MRL <sup>1</sup>     | 4                            | 26.0                    | [30]       |
| qMRL002       | MRL                  | 7                            | 33.0                    | [30]       |
| qMRL003       | MRL                  | 12                           | 17.0                    | [30]       |
| qLRN001       | LRN <sup>2</sup>     | (11)                         | 39.0                    | [30]       |
| qBRT001       | BRT <sup>3</sup>     | 11                           | 12.0                    | [30]       |
| qRFW001       | RFW <sup>4</sup>     | 1                            | 26.0                    | [30]       |
| qRFW002       | RFW                  | (2)                          | 20.0                    | [30]       |
| qRDW001       | RDW <sup>5</sup>     | (2)                          | 34.0                    | [30]       |
| qRDW002       | RDW                  | 12                           | 19.0                    | [30]       |
| qSDW001       | SDW <sup>6</sup>     | 2                            | 34.0                    | [30]       |
| qSDW002       | SDW                  | 10                           | 18.0                    | [30]       |
| qSDW003       | SDW                  | 12                           | 18.0                    | [30]       |
| qSFW001       | SFW <sup>7</sup>     | (2)                          | 33.0                    | [30]       |
| qSFW002       | SFW                  | 6                            | 29.0                    | [30]       |
| qSFW003       | SFW                  | 8                            | 12.0                    | [30]       |
| qSFW004       | SFW                  | 12                           | 21.0                    | [30]       |
| qSFW/SDW001   | SFW/SDW <sup>8</sup> | 3                            | 19.0                    | [30]       |
| qSFW/SDW002   | SFW/SDW              | 5                            | 20.0                    | [30]       |

|             |                       |    |      |      |
|-------------|-----------------------|----|------|------|
| qSFW/SDW003 | SFW/SDW               | 9  | 15.0 | [30] |
| LA-D        | LA <sup>9</sup>       | 18 | 6.3  | [47] |
| RECL-D      | RECL <sup>10</sup>    | 15 | 9.2  | [47] |
| RWCL-D      | RWCL <sup>11</sup>    | 16 | 10.1 | [47] |
| PH-D        | PH <sup>12</sup>      | 13 | 5.9  | [47] |
| NNMS-D      | NNMS <sup>13</sup>    | 16 | 15.2 | [47] |
| BN-D        | BN <sup>14</sup>      | 11 | 5.3  | [47] |
| BIOMASS-D   | BIOMASS <sup>15</sup> | 11 | 7.6  | [47] |
| SWPP-D      | SWPP <sup>16</sup>    | 2  | 4.5  | [47] |
| SWPP-D      | SWPP                  | 8  | 5.1  | [47] |

<sup>1</sup>MRL: Maximum root length; <sup>2</sup>LRN: Lateral root number; <sup>3</sup>BRT: Basal root thickness; <sup>4</sup>RFW: Root fresh weight;

<sup>5</sup>SDW: Shoot dry weight; <sup>6</sup>SFW: Shoot fresh weight; <sup>7</sup>SDW: Shoot dry weight; <sup>8</sup>SFW/SDW: Ratio of shoot fresh weight to shoot dry weight; <sup>9</sup>LA: Leaf area; <sup>10</sup>RECL: Relative electric conductivity of leaves; <sup>11</sup>RWCL: relative water content of leaves; <sup>12</sup>PH: Plant height; <sup>13</sup>NNMS: node number of main stem; <sup>14</sup>BN, branch number;

<sup>15</sup>BIOMASS: Biomass; <sup>16</sup>SWPP, seed weight per plant.
